# Supplementary material
Source: PubMed Central journal article supplement (PMC6380632)
Supplement: CONC-26-e115-s001.pdf [file CONC-26-e115-s001.pdf]

## Supplemental Materials for

### A case of nivolumab-induced acute-onset type 1 diabetes mellitus in melanoma

C. Sakaguchi MD,\* K. Ashida MD PhD,\* § S. Yano MD,\* K. Ohe MD PhD,† N. Wada MD PhD,‡ N. Hasuzawa MD,\* § Y. Matsuda MD PhD,\* S. Sakamoto MD PhD,\* R. Sakamoto MD PhD,\* H. Uchi MD PhD,‡ M. Furue MD PhD,‡ M. Nomura MD PhD,\*§ Y. Ogawa MD PhD\*

\*Department of Medicine and Bioregulatory Science, Graduate School of Medical Sciences, Kyushu University, 3-1-1 Maidashi, Higashi-ku, Fukuoka, 812-8582 Japan

†Faculty of Pharmaceutical Sciences, Fukuoka University, 8-19-1 Nanakuma, Sawara-ku, Fukuoka, 814-0180 Japan

‡Department of Dermatology, Kyushu University Hospital, 3-1-1 Maidashi, Higashi-ku, Fukuoka, 812-8582 Japan

§Division of Endocrinology and Metabolism, Department of Internal Medicine, Kurume University School of Medicine, 67 Asahi-machi, Kurume, Fukuoka, 830-0011 Japan

For reprints and all correspondences: Kenji Ashida,  
Division of Endocrinology and Metabolism, Department of Internal Medicine,  
Kurume University School of Medicine,  
Asahi-machi 67, Kurume, Fukuoka, 830-0011 Japan.  
Phone: +81-942-31-7563  
Fax: +81-942-35-8943  
E-mail: ashida@med.kurume-u.ac.jp

### Listing of Supplemental Material(s):

Supplemental Appendix 1: Supplemental Table 1

Supplemental Table 1: Review of previously reported cases of immuno-checkpoint inhibitor-induced type 1 diabetes mellitus

**Supplemental Table 1. Review of previously reported cases of immuno-checkpoint inhibitor-induced type 1 diabetes mellitus**

| Author, year                         | Age /Sex | Primary Diagnosis     | immuno-CPI drugs | Duration of immuno-CPIs treatment | Islet auto-antibodies    | HLA typing                                                                                            | Style of diabetes | GCT |
|--------------------------------------|----------|-----------------------|------------------|-----------------------------------|--------------------------|-------------------------------------------------------------------------------------------------------|-------------------|-----|
| Present case                         | 68/F     | Melanoma              | NIV              | 60 weeks                          | None                     | DRB1*09:01                                                                                            | DKA+              | +   |
| Hughes J., 2015 <sup>1</sup>         | 55/F     | Melanoma              | NIV+IPI          | 5 months                          | None                     | A2.1+, DR4                                                                                            | DKA+              | +   |
|                                      | 83/F     | NSCLC                 | NIV              | <1 month                          | GAD+                     | A2.1+, DR4                                                                                            | DKA+              | -   |
|                                      | 63/M     | RCC                   | NIV              | 4 months                          | GAD+/ICA+<br>/IAA+       | A2.1+, DR4                                                                                            | DKA-              | -   |
| 58/M                                 | SCLC     | NIV                   | 1 week           | GAD+                              | A2.1+                    | DKA+                                                                                                  | -                 |     |
|                                      | 64/F     | Melanoma              | PEM              | < 1 month                         | None                     | DR4+                                                                                                  | DKA+              | -   |
| Martin-Liberal J., 2015 <sup>2</sup> | 54/F     | Melanoma              | PEM              | 9 weeks                           | GAD+/IAA+<br>/ICA-       | DRB1*4, DQB1*0302<br>(HLA A2 DR4 DQ8)                                                                 | DKA+              | -   |
| Mellati M., 2015 <sup>3</sup>        | 70/M     | NSCLC                 | PDL1 antibody    | 15 weeks                          | GAD-/IA2-<br>/IAA-/ZnT8- | N/A                                                                                                   | DKA+              | -   |
|                                      | 66 /F    | Head & neck carcinoma | PD-1 antibody    | 7 weeks                           | GAD+/IA2-<br>/IAA-/ZnT8- | DR3-DQ2, DR4-DQ8                                                                                      | DKA+              | -   |
| Aleksova J., 2016 <sup>4</sup>       | 60 /M    | Melanoma              | (IPI)→ PEM       | 5 weeks                           | GAD-/IA2-                | N/A                                                                                                   | DKA+              | +   |
| Hansen E., 2016 <sup>5</sup>         | 58 /M    | Melanoma              | PEM              | 12 months                         | GAD+/ICA-                | N/A                                                                                                   | N/A               | -   |
| Araújo M., 2017 <sup>6</sup>         | 73/F     | NSCLC                 | NIV              | 25 days                           | GAD+/ICA-                | DRB*03:01-DQA1*05:01-<br>DQB1*02:01/DRB1*04:01-<br>DQA1*03:01DQB1*03:02;<br>A*02:01, *24:06; B*40:01, | DKA+/Flu          | -   |

|                                         |       |                         |            |           |                          |                                                              |          |   |
|-----------------------------------------|-------|-------------------------|------------|-----------|--------------------------|--------------------------------------------------------------|----------|---|
| Hoffman L.,<br>2016 <sup>7</sup>        | 70 /F | Melanoma                | NIV        | 6 weeks   | GAD-/IA2-                | N/A                                                          | N/A      | - |
|                                         | 78 /F | Melanoma                | (IPI→) NIV | 3 weeks   | GAD+                     | N/A                                                          | DKA+     | - |
|                                         | 40/M  | Melanoma                | NIV        | 6 weeks   | N/A                      | N/A                                                          | N/A      | - |
|                                         | 58 /F | Melanoma                | (IPI→) PEM | 3 weeks   | GAD+/IA2±                | N/A                                                          | N/A      | - |
| Miyoshi Y.,<br>2016 <sup>8</sup>        | 66 /F | Melanoma                | NIV        | 17 weeks  | GAD-/IA2-<br>/ZnT8-      | DRB1*11:01, 13:02;01;<br>DQB1*03:01:01, 06:04:01             | DKA+/Flu | - |
|                                         | 55 /F | Melanoma                | NIV        | 12 months | GAD-/IA2-<br>/IAA-ZnT8-  | DRB1*04:05, DQB1*04:01                                       | DKA+/Flu | - |
| Chae YK.,<br>2017 <sup>10</sup>         | 76/M  | NSCLC                   | PEM        | 6 weeks   | GAD+/IA2+<br>/ICA-       | N/A                                                          | DKA-     | + |
| Changizzadeh<br>PN., 2017 <sup>11</sup> | 42/M  | Melanoma                | NIV+IPI    | 9 weeks   | GAD-/ZnT8-<br>/IA2-      | N/A                                                          | DKA+     | + |
| Gauci ML.,<br>2017 <sup>12</sup>        | 73/M  | Melanoma                | NIV        | 6 weeks   | GAD+/ZnT8+<br>/IA2+/IAA+ | N/A                                                          | DKA+     | - |
| Godwin JL.,<br>2017 <sup>13</sup>       | 34/F  | NSCLC                   | NIV        | 2 weeks   | GAD+/IA2+/ZnT8+<br>nT8+  | A30:01, 30:02;<br>D09:CTZ,09:CTZ                             | DKA+     | - |
| Hickmott L.,<br>2017 <sup>14</sup>      | 57/M  | Urothelial<br>carcinoma | ATE        | 15 weeks  | GAD-/ICA-                | DRB1*11, DRB1*04;<br>DRB3*02, DRB4*01;<br>DQB1*03, DQB1*03   | DKA+     | - |
| Ishikawa K.,<br>2017 <sup>15</sup>      | 54/F  | Melanoma                | NIV        | 2 months  | GAD-/IA2-                | B*15:01, *40:06;<br>DRB1*04:05, *04:06;<br>DQB1*03:02, 04:01 | DKA-/Flu | - |

|                                       |      |                          |         |           |                          |                                                         |          |     |
|---------------------------------------|------|--------------------------|---------|-----------|--------------------------|---------------------------------------------------------|----------|-----|
| Lowe JR.,<br>2018 <sup>16</sup>       | 68/M | Melanoma                 | NIV+IPI | 4 months  | GAD-                     | N/A                                                     | DKA+     | +   |
| Matsumura K.,<br>2018 <sup>17</sup>   | 67/M | NSCLC                    | NIV     | 30 days   | GAD-/IA2-                | A*24:02, DRB1*09:01;<br>DRB1*15:02                      | DKA-/Flu | +   |
| Kapke J.,<br>2017 <sup>18</sup>       | 83/M | Head & neck<br>carcinoma | NIV     | 3 months  | GAD+                     | DRB1*08, DRB1*11,<br>DQB1*03, DQB1*04                   | DKA+     | -   |
|                                       | 63/F | Urothelial<br>carcinoma  | ATE     | 6 weeks   | GAD+                     | DRB1*03, DRB1*04,<br>DQB1*02, DQB1*03                   | DKA+     | -   |
|                                       | 62/F | NSCLC                    | NIV     | 10 weeks  | GAD-                     | DRB*09:01-<br>DQB1*03:03                                | DKA-     | -   |
| Kumagai R.,<br>2017 <sup>19</sup>     | 73/M | NSCLC                    | NIV     | 25 weeks  | GAD-/IA2-<br>/IAA-/ZnT8- | DRB1*09:01-<br>DQB1*03:03;<br>DRB1+01:01-<br>DQB1*05:01 | DKA-     | -   |
| Li L.,<br>2017 <sup>20</sup>          | 63/M | NSCLC                    | NIV     | 27 days   | GAD+                     | N/A                                                     | DKA+     | -   |
| Marchand L.,<br>2017 <sup>21</sup>    | 55/M | Pleomorphic<br>carcinoma | NIV     | 9 courses | GAD-/ICA-<br>/IA2-/ZnT8- | N/A                                                     | DKA+/Flu | N/A |
| Munakata W.,<br>2017 <sup>22</sup>    | 72/M | HL                       | NIV     | 10 weeks  | GAD-/ZnT8-               | B*4002                                                  | DKA-     | -   |
| Smith-Cohn<br>MA., 2017 <sup>23</sup> | 67/F | Cholangio<br>carcinoma   | PEM     | 3 months  | GAD+/ICA-<br>/IA2-/ZnT8- | N/A                                                     | DKA+     | +   |
| Teramoto Y.,<br>2017 <sup>24</sup>    | 63/F | Melanoma                 | NIV     | 30 weeks  | GAD-/IA2-<br>/IAA-       | N/A                                                     | DKA+/Flu | -   |
| Usui Y.,<br>2017 <sup>25</sup>        | 31/M | NSCLC                    | NIV     | 13 days   | GAD+                     | DR1*04:05-<br>DQB1*04:01                                | DKA+/Flu | -   |

To date, there have been 35 reports of immuno-CPI-induced T1DM in literature.

†, Glucocorticoid was administered in all 7 patients who developed immune-CPIs-induced T1DM. T1DM could not be reversed in any of the patients.

immuno-CPIs, immuno-checkpoint inhibitors; T1DM, type 1 diabetes mellitus; NIV, nivolumab; IPI, ipilimumab; PEM, pembrolizumab; PDL1 antibody, programmed cell death-1 ligand; ATE, atezolizumab; DKA, diabetic ketoacidosis; GC; glucocorticoid; NSCLC, non-small cell lung cancer; SCLC, small cell lung cancer; RCC, renal cell carcinoma; HL, Hodgkin's lymphoma; NIV, nivolumab; IPI, ipilimumab; PEM; pembrolizumab, ATE, atezolizumab; N/A, not applicable; GAD, glutamic acid decarboxylase; IA2, insulinoma-associated antigen-2; IAA, insulin autoantibody; ZnT8, zinc transporter 8; ICA, islet cell antibody; N/A, not applicable.

## REFERENCES

1. Hughes J, Vudattu N, Sznol M, et al. Precipitation of autoimmune diabetes with anti-PD-1 immunotherapy. *Diabetes Care* 2015;38:e55–7.
2. Martin-Liberal J, Furness AJ, Joshi K, Peggs KS, Quezada SA, Larkin J. Anti-programmed cell death-1 therapy and insulin-dependent diabetes: a case report. *Cancer Immunol Immunother* 2015;64:765–7.
3. Mellati M, Eaton KD, Brooks-Worrell BM, et al. Anti-PD-1 and Anti-PDL-1 Monoclonal Antibodies Causing Type 1 Diabetes. *Diabetes Care* 2015;38:e137–8.
4. Aleksova J, Lau PK, Soldatos G, McArthur G. Glucocorticoids did not reverse type 1 diabetes mellitus secondary to pembrolizumab in a patient with metastatic melanoma. *BMJ Case Rep* 2016;pii: bcr2016217454
5. Hansen E, Sahasrabudhe D, Sievert L. A case report of insulin-dependent diabetes as immune-related toxicity of pembrolizumab: presentation, management and outcome. *Cancer Immunol Immunother* 2016;65:765–7.
6. Araújo M, Ligeiro D, Costa L, et al. A case of fulminant Type 1 diabetes following anti-PD1 immunotherapy in a genetically susceptible patient. *Immunotherapy* 2017;9:531–5.
7. Hofmann L, Forschner A, Loquai C, et al. Cutaneous, gastrointestinal, hepatic, endocrine, and renal side-effects of anti-PD-1 therapy. *Eur J Cancer* 2016;60:190–209.
8. Miyoshi Y, Ogawa O, Oyama Y. Nivolumab, an Anti-Programmed Cell Death-1 Antibody, Induces Fulminant Type 1 Diabetes. *Tohoku J Exp Med* 2016;239:155–8.
9. Okamoto M, Okamoto M, Gotoh K, et al. Fulminant type 1 diabetes mellitus with anti-programmed cell death-1 therapy. *J Diabetes Investig* 2016;7:915–8.
10. Chae YK, Chiec L, Mohindra N, Gentzler R, Patel J, Giles F. A case of pembrolizumab-induced type-1 diabetes mellitus and discussion of immune checkpoint inhibitor-induced type 1 diabetes. *Cancer Immunol Immunother* 2017;66:25–32.
11. Changizzadeh PN, Mukkamalla SKR, Armenio VA. Combined checkpoint inhibitor therapy causing diabetic ketoacidosis in metastatic melanoma. *J Immunother Cancer* 2017;5:97.
12. Gauci ML, Laly P, Vidal-Trecan T, et al. Autoimmune diabetes induced by PD-1 inhibitor-retrospective analysis and pathogenesis: a case report and literature review. *Cancer Immunol Immunother* 2017;66:1399–410.
13. Godwin JL, Jaggi S, Sirisena I, et al. Nivolumab-induced autoimmune diabetes mellitus presenting as diabetic ketoacidosis in a patient with metastatic lung cancer. *J Immunother Cancer* 2017;5:40.
14. Hickmott L, De La Peña H, Turner H, et al. Anti-PD-L1 Atezolizumab-Induced Autoimmune Diabetes: a Case Report and Review of the Literature. *Target Oncol* 2017;12:235–41.
15. Ishikawa K, Shono-Saito T, Yamate T, et al. A case of fulminant type 1 diabetes mellitus, with a precipitous decrease in pancreatic volume, induced by nivolumab for malignant melanoma: analysis of HLA and CTLA-4 polymorphisms. *Eur J Dermatol* 2017;27:184–5.
16. Lowe JR, Perry DJ, Salama AK, Mathews CE, Moss LG, Hanks BA. Genetic risk analysis of a patient with fulminant autoimmune type 1 diabetes mellitus secondary to combination ipilimumab and nivolumab immunotherapy. *J Immunother Cancer* 2016;4:89.
17. Matsumura K, Nagasawa K, Oshima Y, et al. Aggravation of diabetes, and incompletely deficient insulin secretion in a case with type 1 diabetes-resistant human leukocyte antigen DRB1\*15:02 treated with nivolumab. *J Diabetes Investig* 2017. doi: 10.1111/jdi.12679. [Epub ahead of print]
18. Kapke J, Shaheen Z, Kilari D, Knudson P, Wong S. Immune Checkpoint Inhibitor-Associated Type 1 Diabetes Mellitus: Case Series, Review of the Literature, and Optimal Management. *Case Rep Oncol* 2017;10:897–909.
19. Kumagai R, Muramatsu A, Nakajima R, et al. Acute-onset type 1 diabetes mellitus caused by nivolumab in a patient with advanced pulmonary adenocarcinoma. *J Diabetes Investig* 2017;8:798–9.

20. Li L, Masood A, Bari S, Yavuz S, Grosbach AB. Autoimmune Diabetes and Thyroiditis Complicating Treatment with Nivolumab. *Case Rep Oncol* 2017;10:230–4.
21. Marchand L, Paulus V, Fabien N, et al. Nivolumab-Induced Acute Diabetes Mellitus and Hypophysitis in a Patient with Advanced Pulmonary Pleomorphic Carcinoma with a Prolonged Tumor Response. *J Thorac Oncol* 2017;12:e182–4.
22. Munakata W, Ohashi K, Yamauchi N, Tobinai K. Fulminant type I diabetes mellitus associated with nivolumab in a patient with relapsed classical Hodgkin lymphoma. *Int J Hematol* 2017;105:383–6.
23. Smith-Cohn MA, Gill D, Voorhies BN, Agarwal N, Garrido-Laguna I. Case report: pembrolizumab-induced Type 1 diabetes in a patient with metastatic cholangiocarcinoma. *Immunotherapy* 2017;9:797–804.
24. Teramoto Y, Nakamura Y, Asami Y, et al. Case of type 1 diabetes associated with less-dose nivolumab therapy in a melanoma patient. *J Dermatol* 2017;44:605–6.
25. Usui Y, Udagawa H, Matsumoto S, et al. Association of Serum Anti-GAD Antibody and HLA Haplotypes with Type 1 Diabetes Mellitus Triggered by Nivolumab in Patients with Non-Small Cell Lung Cancer. *J Thorac Oncol* 2017;12:e41–3.
